# Supplementary material for: Characterization of the binding of the Finland trityl radical with bovine serum albumin
Source: Royal Society of Chemistry journal article supplement (doi:10.1039/c4ra04616a), 2014-01-01
Supplement: c4ra04616a1.pdf [file c4ra04616a1.pdf]

## Characterization of the Binding of the Finland Trityl Radical with Bovine Serum Albumin

Yuguang Song,<sup>†,‡</sup> Yangping Liu,<sup>†,‡,\*</sup> Wenbo Liu,<sup>†</sup> Frederick A. Villamena,<sup>‡,§</sup> and Jay L. Zweier<sup>‡,\*</sup>

*<sup>†</sup>Tianjin Key Laboratory on Technologies Enabling Development of Clinical Therapeutics and  
Diagnostics, School of Pharmacy, Tianjin Medical University, Tianjin 300070, China.*

*<sup>‡</sup>The Davis Heart and Lung Research Institute, the Division of Cardiovascular Medicine,  
Department of Internal Medicine, The Ohio State University, Columbus, OH, 43210, United States.*

*<sup>§</sup>Department of Pharmacology, College of Medicine, The Ohio State University, Columbus, Ohio  
43210, United States.*

\*Corresponding authors: Yangping Liu and Jay L. Zweier

Email: [ypliu@iccas.ac.cn](mailto:ypliu@iccas.ac.cn), [jay.zweier@osumc.edu](mailto:jay.zweier@osumc.edu)

**10<sup>th</sup> December 2015**

**Note added after first publication:** This Supplementary Information file replaces that originally published on 30<sup>th</sup> September 2014. Due to an editorial error, a different file provided by the authors was mistakenly uploaded.

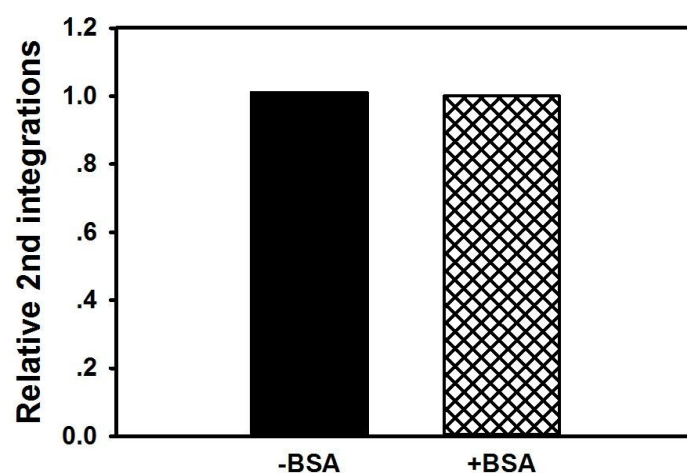

Figure S1. Double integrations of the EPR signals of CT-03 (20  $\mu\text{M}$ ) in the absence and presence of BSA (100  $\mu\text{M}$ ) in PBS.

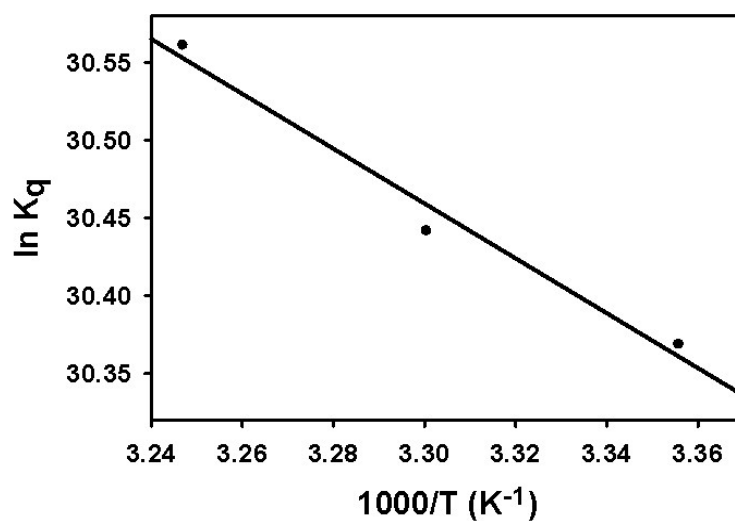

Figure S2. Arrhenius plot of CT-03 and BSA system at pH 7.4 at 298K.

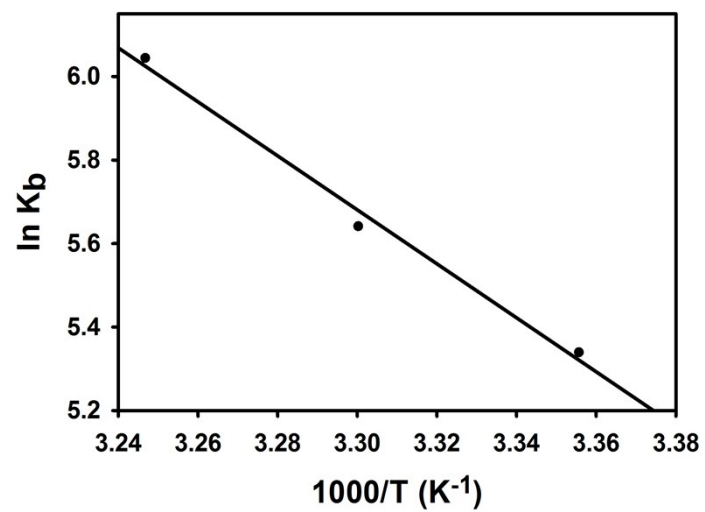

Figure S3. Van's Hoff plot for the interaction of CT-03 and BSA at 298K.

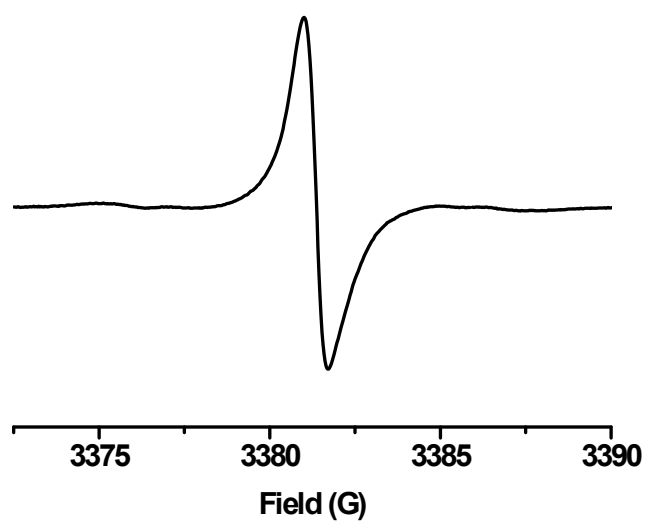

Figure S4. EPR spectrum of CT-03 (50  $\mu$ M) with a linewidth of 710 mG in frozen PBS at 233K.
